# Supplementary material for: Talentontwikkeling en professionalisering,Een onderzoek naar nieuwe initiatieven in het Utrechtse theaterveld
Source: Royal Society of Chemistry journal article supplement (doi:10.1039/d4ra05600k), 2014-09-10
Supplement: d4ra05600k1.pdf [file d4ra05600k1.pdf]

## Supplementary Information

*for*

### Detection of Nitro-Aromatics using $C_5N_2$ as an Electrochemical Sensor: a DFT approach

Nabeela<sup>1</sup>, Muhammad Ali Hashmi<sup>1,2\*</sup>, Ahmad Nauman Shah Saqib<sup>1</sup>, Aqsa Kamran<sup>1</sup>, Ahmed Lakhani<sup>3,\*\*</sup>

<sup>1</sup> *Department of Chemistry, Division of Science & Technology, University of Education, 54770 Lahore, Pakistan*

<sup>2</sup> *School of Chemical and Physical Sciences, Victoria University of Wellington, Wellington 6012, New Zealand*

<sup>3</sup> *Department of Biomedical and Health Sciences, Calumet College of St. Joseph, 2400, New York Ave, Whiting, IN, 46394, USA*

\* Correspondence: [muhammad.hashmi@ue.edu.pk](mailto:muhammad.hashmi@ue.edu.pk) (MAH); [alakhani@ccsj.edu](mailto:alakhani@ccsj.edu) (AL)

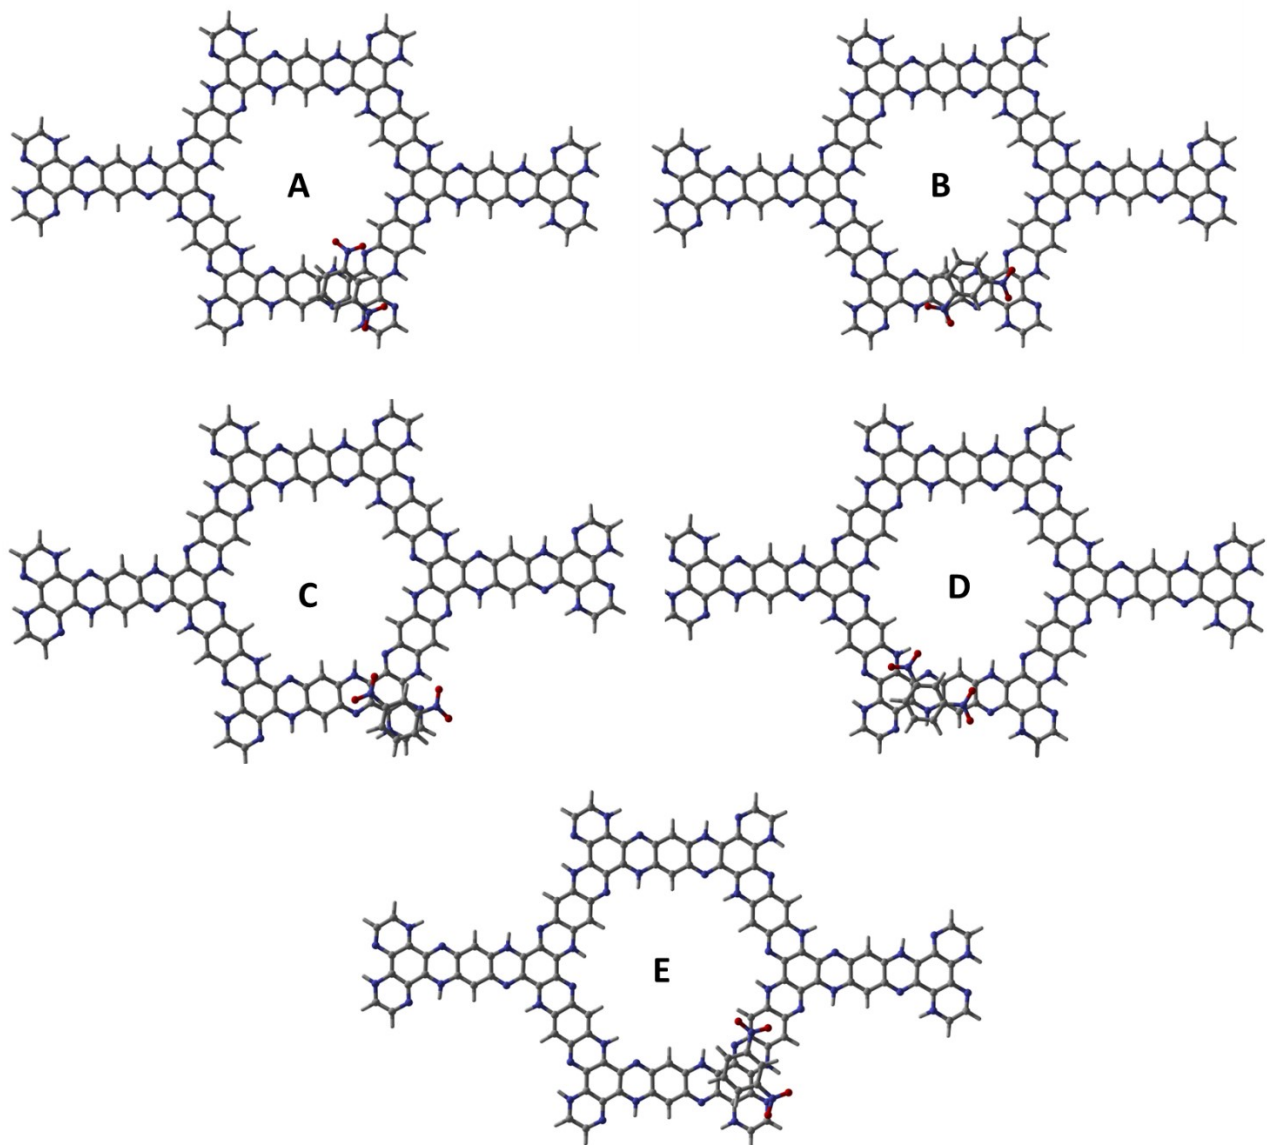

**Fig. S1 : Optimized geometry of 1,3-DNB@C<sub>5</sub>N<sub>2</sub> with all positions. The positions are; central cavity (A), triazine site (B), benzene ring (C), hydrogenated benzene ring (D) and pyrazine ring (E).**

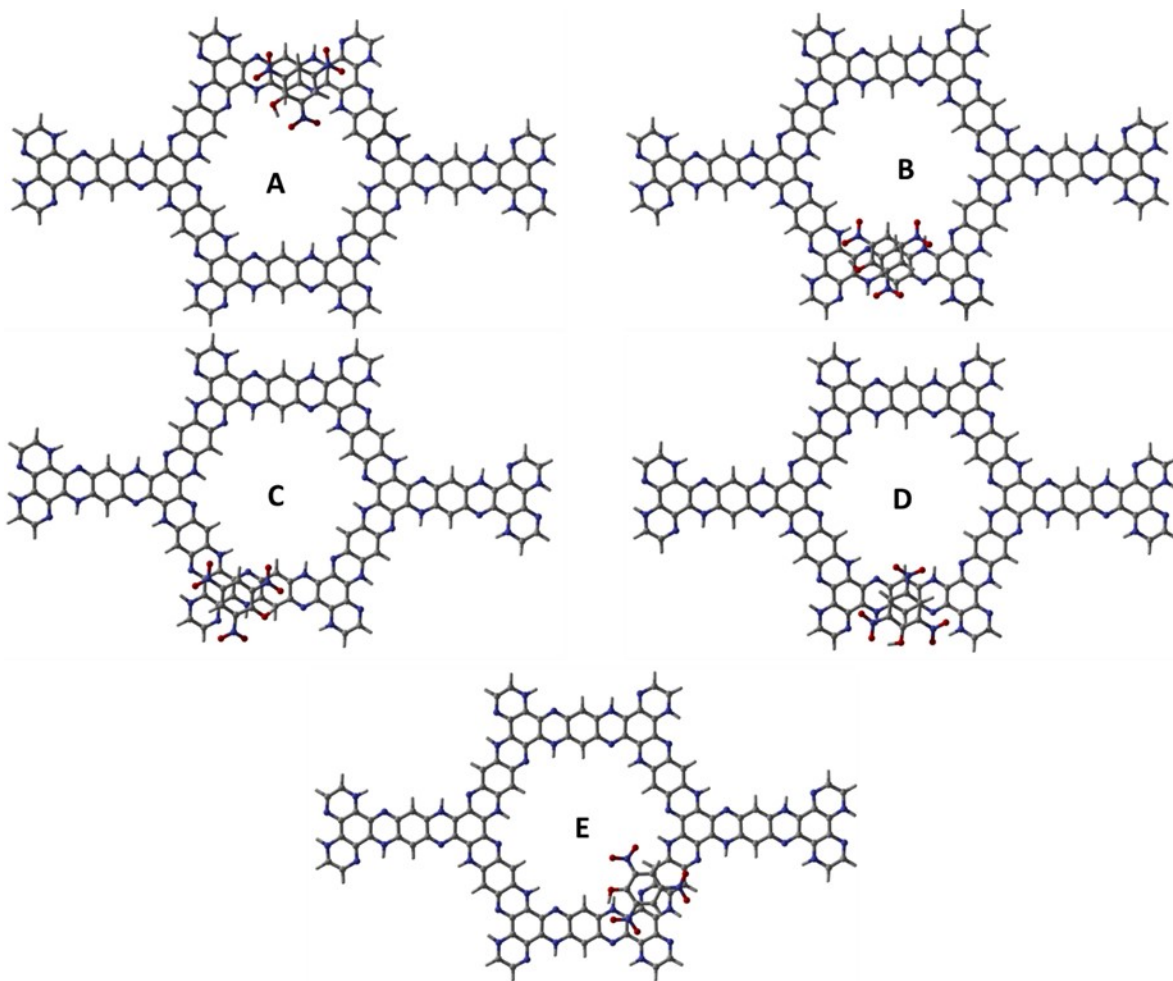

**Fig. S2: Optimized geometries of PA@C<sub>5</sub>N<sub>2</sub> with all possible positions. The positions are; central cavity (A), triazine site (B), benzene ring (C), hydrogenated benzene ring (D) and pyrazine ring (E).**

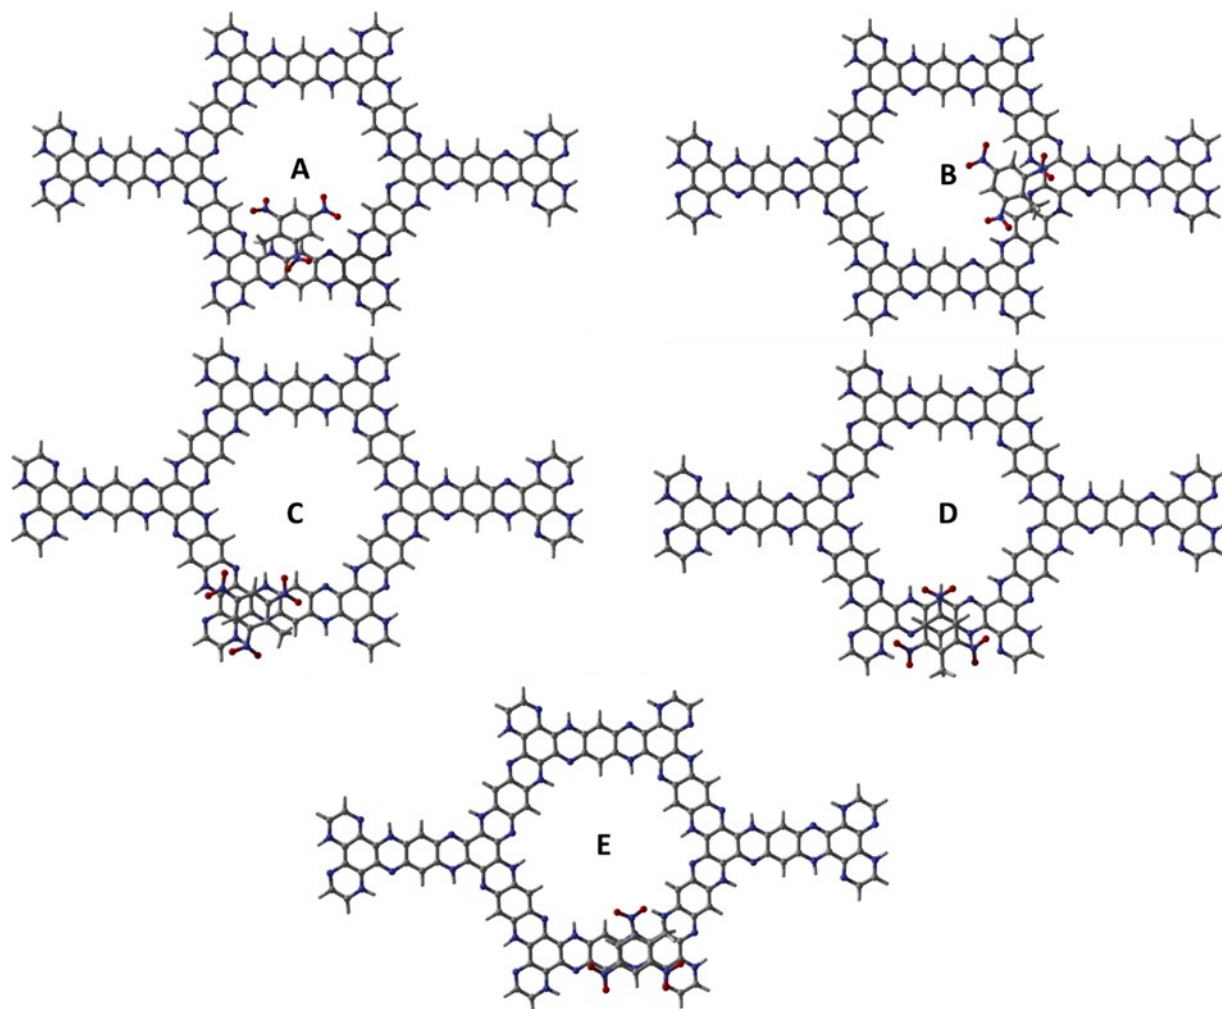

**Fig. S3: Optimized geometries of TNT@C<sub>5</sub>N<sub>2</sub> with all possible positions. The positions are; central cavity (A), triazine site (B), benzene ring (C), hydrogenated benzene ring (D) and pyrazine ring (E).**

**Table S1 Interaction energies of all analytes@C<sub>5</sub>N<sub>2</sub> Complexes at possible positions. The positions are; central cavity (A), triazine site (B), benzene ring (C), hydrogenated benzene ring (D) and pyrazine ring (E).**

| Analyte at specific position of C <sub>5</sub> N <sub>2</sub> | Interaction Energies (Kcal/mol) | Analyte at specific position of C <sub>5</sub> N <sub>2</sub> | Interaction Energies (Kcal/mol) | Analyte at specific position of C <sub>5</sub> N <sub>2</sub> | Interaction Energies (Kcal/mol) |
|---------------------------------------------------------------|---------------------------------|---------------------------------------------------------------|---------------------------------|---------------------------------------------------------------|---------------------------------|
| TNT@C <sub>5</sub> N <sub>2</sub> -A                          | -25.01                          | PA@C <sub>5</sub> N <sub>2</sub> -A                           | -30.41                          | 1-3-DNB@C <sub>5</sub> N <sub>2</sub> -A                      | -22.80                          |
| TNT@C <sub>5</sub> N <sub>2</sub> -E                          | -30.36                          | PA@C <sub>5</sub> N <sub>2</sub> -E                           | -30.38                          | 1-3-DNB@C <sub>5</sub> N <sub>2</sub> -E                      | -21.82                          |
| TNT@C <sub>5</sub> N <sub>2</sub> -B                          | -30.92                          | PA@C <sub>5</sub> N <sub>2</sub> -B                           | -29.23                          | 1-3-DNB@C <sub>5</sub> N <sub>2</sub> - B                     | -20.48                          |
| <b>TNT@C<sub>5</sub>N<sub>2</sub>-C</b>                       | <b>-31.64</b>                   | <b>PA@C<sub>5</sub>N<sub>2</sub>-C</b>                        | <b>-34.37</b>                   | 1-3-DNB@C <sub>5</sub> N <sub>2</sub> -C                      | -22.38                          |
| TNT@C <sub>5</sub> N <sub>2</sub> -D                          | -30.35                          | PA@C <sub>5</sub> N <sub>2</sub> -D                           | -33.70                          | <b>1-3-DNB@C<sub>5</sub>N<sub>2</sub>-D</b>                   | <b>-23.21</b>                   |

**Table S2 QTAIM parameter for 1,3-DNB@C<sub>5</sub>N<sub>2</sub> and TNT@C<sub>5</sub>N<sub>2</sub>**

| Analyte--C <sub>5</sub> N <sub>2</sub> | $\nabla_2\rho$ | $\rho$ | V(r)   | H      | G(r)  |
|----------------------------------------|----------------|--------|--------|--------|-------|
| 1,3-DNB@C <sub>5</sub> N <sub>2</sub>  |                |        |        |        |       |
| O 13 -- C 1                            | 0.030          | 0.009  | -0.006 | 0.0009 | 0.007 |
| C 12 -- C6                             | 0.030          | 0.010  | -0.005 | 0.0012 | 0.006 |
| C 8 -- C3                              | 0.025          | 0.009  | -0.004 | 0.0010 | 0.005 |
| O11 -- N7                              | 0.033          | 0.009  | -0.007 | 0.0006 | 0.008 |
| C 14 -- N4                             | 0.019          | 0.008  | -0.004 | 0.0004 | 0.004 |
| C10 -- C5                              | 0.027          | 0.011  | -0.005 | 0.0008 | 0.006 |
| C 9 -- C 2                             | 0.025          | 0.008  | -0.004 | 0.0011 | 0.005 |
| TNT@C <sub>5</sub> N <sub>2</sub>      |                |        |        |        |       |
| O5 -- C10                              | 0.028          | 0.008  | -0.005 | 0.0009 | 0.006 |
| O2 -- N6                               | 0.025          | 0.007  | -0.005 | 0.0008 | 0.005 |
| N13 -- N11                             | 0.037          | 0.010  | -0.006 | 0.0014 | 0.008 |
| N16 -- C18                             | 0.028          | 0.009  | -0.005 | 0.0010 | 0.006 |
| H19 -- C21                             | 0.028          | 0.010  | -0.005 | 0.0007 | 0.006 |
| O 17 -- C20                            | 0.026          | 0.008  | -0.005 | 0.0009 | 0.005 |
| C15 -- N22                             | 0.023          | 0.008  | -0.004 | 0.0007 | 0.005 |
| C14 -- C12                             | 0.027          | 0.009  | -0.004 | 0.0012 | 0.006 |
| C4 -- C9                               | 0.035          | 0.014  | -0.007 | 0.0010 | 0.008 |
| N3 -- C7                               | 0.030          | 0.009  | -0.005 | 0.0011 | 0.006 |
| O1 -- N8                               | 0.028          | 0.009  | -0.006 | 0.0005 | 0.006 |

**Table.S3 Recovery time of nitroaromatics at different temperatures (K)**

| <b>Analyte-Complex Systems</b>        | <b>Recovery Time (298K)</b> | <b>Recovery Time (398K)</b> | <b>Recovery Time (473K)</b> |
|---------------------------------------|-----------------------------|-----------------------------|-----------------------------|
| PA@C <sub>5</sub> N <sub>2</sub>      | $1.57 \times 10^{11}$ s     | $7.33 \times 10^4$ s        | 74.74 s                     |
| TNT@C <sub>5</sub> N <sub>2</sub>     | $1.56 \times 10^9$ s        | $2.32 \times 10^3$ s        | 4.10 s                      |
| 1,3-DNB@C <sub>5</sub> N <sub>2</sub> | $1.03 \times 10^3$ s        | $1.13 \times 10^{-14}$ s    | $5.24 \times 10^{-4}$ s     |
